# Supplementary material for: Immunophenotypic aberrant hematopoietic stem cells in myelodysplastic syndromes: a biomarker for leukemic progression
Source: PubMed Central journal article supplement (PMC9991914; doi:10.1038/s41375-023-01811-5), 2023-02-15
Supplement: 41375_2023_1811_MOESM1_ESM.pdf [file 41375_2023_1811_MOESM1_ESM.pdf]

- 1 Immunophenotypic aberrant hematopoietic stem cells in myelodysplastic syndromes: a
- 2 biomarker for leukemic progression

|          |                                                                    |              |
|----------|--------------------------------------------------------------------|--------------|
| <b>3</b> | <b>Table of Contents</b>                                           |              |
| 4        | Figure S1 Flowchart of the study population                        | page 3       |
| 5        | Sample preparation                                                 | page 4       |
| 6        | Flow cytometry                                                     | page 4       |
| 7        | Tables S1A-B LSC tubes                                             | page 5       |
| 8        | Table S2 Sequencing panel                                          | page 6       |
| 9        | Gating strategy of IA-HSCs                                         | page 7       |
| 10       | Figure S2 Gating strategy                                          | page 8       |
| 11       | Figure S3 Validation of the gating strategy                        | page 9       |
| 12       | Figure S4 Measured CD34 <sup>+</sup> cell counts                   | page 10      |
| 13       | Table S3A-B Univariate and multivariate survival analyses          | page 11 - 12 |
| 14       | Figure S5 Analysis of stem cells in sequential bone marrow samples | page 13      |
| 15       | Table S4 Mutations in BM-MNCs from a subsampled MDS patient cohort | page 14      |
| 16       | In vivo xenotransplantation                                        | page 15      |
| 17       | Figure S6 Xenograft counts                                         | page 16      |
| 18       | Figure S7 Human engraftment in spleen and peripheral blood         | page 17      |

19 Figure S1 Flowchart of the study population

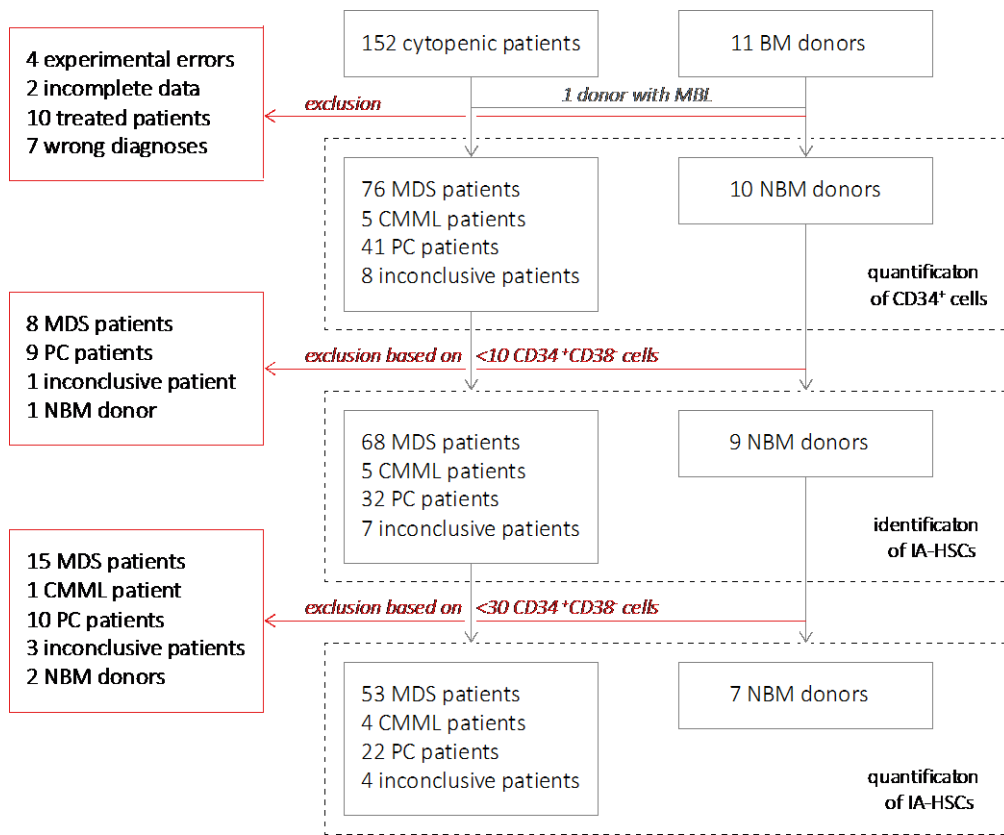

20 Normal bone marrow (NBM) was collected from age-matched cardiothoracic surgery patients (median  
 21 age (range): NBM, 68 (62-80) years versus myelodysplastic syndromes (MDS), 70 (69-88) years). Patients  
 22 with reactive conditions, nutritional deficiencies or non-myeloid clonal disorders were considered as  
 23 pathological controls (PC). Twenty-three patients were excluded because of experimental errors (n=4),  
 24 insufficient clinical data (n=2), a history of therapy for MDS before bone marrow (BM) sampling (n=10)  
 25 or cytopenia due to non-MDS malignancy, including myelofibrosis (n=2), multiple myeloma (MM, n=1),  
 26 acute myeloid leukemia (AML, n=1), acute erythroid leukemia (n=1), polycythemia vera (n=1) and  
 27 Diamond-Blackfan anemia (n=1). Two patients with MDS in addition to MM were included and were  
 28 previously treated for MM prior to bone marrow sampling. One BM donor was considered as PC because  
 29 of the presence of monoclonal B cell lymphocytosis (MBL). Two patients with MDS in addition to MM  
 30 were included. Quantitative analysis of the CD34<sup>+</sup> cell compartment was performed in all included  
 31 patients. By defining the limit of detection (LoD) and limit of quantification (LoQ) at  $\geq 10$  and  $\geq 30$   
 32 CD34<sup>+</sup>CD38<sup>-</sup> cells, the presence and the number of immunophenotypic aberrant hematopoietic stem  
 33 cells (IA-HSCs) was determined in 121/140 and 90/140 samples, respectively.

34 Sample preparation

35 Bone marrow (BM) samples were analyzed fresh (82%) or after cryopreservation (18%). Fresh samples  
36 were deprived of erythrocytes using an ammonium chloride solution (Pharm Lyse, BD Biosciences) for  
37 10 minutes at room temperature. Lysed samples were washed twice and resuspended in the washing  
38 solution (phosphate buffer saline (PBS) with 0.1% human serum albumin (HSA) and 0.05% sodium  
39 azide). Mononuclear cells (MNCs) were obtained using a Ficoll gradient (1.077 g/mL, Amersham  
40 Biosciences) and erythrocyte lysis using home-made ammonium chloride buffered lysing solution and  
41 then cryopreserved in RPMI-1640 (Gibco, Life technologies) with 20% heat-inactivated fetal bovine  
42 serum (FBS, Greiner) and 10% DMSO (Riedel-de Haën). Cryopreserved MNCs were thawed in a 37 °C  
43 water bath and recovered in preheated RPMI with 20% FBS, 0.1% DNase (Sigma-Aldrich) and 0.1% MgCl<sub>2</sub>  
44 [1M]. Thawed MNCs were washed and resuspended in PBS with 0.1% HSA.

45

46 Flow cytometry

47 Prepared cells were incubated with the antibody mixture ([Table S1A-B](#)) for 30 minutes at room  
48 temperature and subsequently washed once with the washing solution. The marker CD371 was  
49 analyzed separate from the Combi channel in 62 samples, including NBM (n=1), MDS (n=35), chronic  
50 myelomonocytic leukemia (n=4), PC (n=19) and inconclusive cases (n=3). All antibodies were purchased  
51 from BD Biosciences, except for the CD366 antibody and the Fixable Viable Stain that were obtained  
52 from R&D Systems and Thermo Fisher Scientific Inc., respectively. Human and murine samples were  
53 measured on a BD FACS Canto II and a BD FACS Celesta, respectively. The quality control of the flow  
54 cytometers was performed daily and the compensation settings were periodically updated following a  
55 standardized protocol.

56 Table S1A The LSC tube

|    | Marker          | Fluorochrome | Clone   |
|----|-----------------|--------------|---------|
| 1  | CD45            | HV500c       | 2D      |
| 2  | CD34            | BV421        | 581     |
| 3  | CD38            | APC          | HB7     |
| 4  | CD33            | PE-Cy7       | P67.6   |
| 5  | CD44            | APC-H7       | G44-26  |
| 6  | CD45RA          | FITC         | L48     |
| 7  | CD123           | PerCP-Cy5.5  | 7G3     |
|    | <i>Combi</i>    |              |         |
| 8  | CD7             | PE           | M-T701  |
| 9  | CD11b           | PE           | D12     |
| 10 | CD22            | PE           | S-HCL-1 |
| 11 | CD56            | PE           | My31    |
| 12 | CD366 (TIM3)    | PE           | 344823  |
| 13 | CD371 (Clec12a) | PE           | 50C1    |

57 The 8-color LSC tube includes common markers (CD45, CD34, CD38) next to lineage- and leukemia-  
58 associated markers. Antigens without expression on normal stem cells can be combined within the PE-  
59 channel (further referred to as “Combi”), since their cumulative expression on normal stem cells  
60 remains negative. CD45RA is absent on normal stem cells but studied separately as this marker was  
61 added later on, i.e. after having validated the Combi channel. CD33, CD44 and CD123 are expressed by  
62 normal stem cells and should therefore be studied separately to define overexpression. <sup>1</sup> All antibodies  
63 were purchased from BD Biosciences, except for the CD366 antibody and the Fixable Viable Stain that  
64 were obtained from R&D Systems and Thermo Fisher Scientific Inc., respectively.

65

66 Table S1B Adjustment of the LSC tube for engraftment analysis

| Number | Marker                      | Fluorochrome | Clone   |
|--------|-----------------------------|--------------|---------|
| 1      | Fixable Viability Stain 780 | APC-H7       |         |
| 2      | muCD45                      | PerCP        | 30-F11  |
| 3      | huCD45                      | HV500c       | 2D      |
| 4      | CD3                         | FITC         | SK7     |
| 5      | CD19                        | BUV737       | SJ25C1  |
| 6      | CD34                        | BV421        | 581     |
| 7      | CD38                        | APC          | HB7     |
| 8      | CD33                        | PE-Cy7       | P67.6   |
| 9      | CD45RA                      | AF700        | HI100   |
| 10     | CD123                       | BV650        | 7G3     |
|        | <i>Combi</i>                |              |         |
| 11     | CD7                         | PE           | M-T701  |
| 12     | CD11b                       | PE           | D12     |
| 13     | CD22                        | PE           | S-HCL-1 |
| 14     | CD56                        | PE           | My31    |
| 15     | CD366 (TIM3)                | PE           | 344823  |
| 16     | CD371 (Clec12a)             | PE           | 50C1    |

67

68 Table S2 Sequencing panel

| Number | Gene     | RefSeq       | Exon                          |
|--------|----------|--------------|-------------------------------|
| 1      | ASXL1    | NM_015338    | 13 (partially)                |
| 2      | BRAF     | NM_004333.4  | ENST00000288602               |
| 3      | CALR     | NM_004343    | 9                             |
| 4      | CBL      | NM_005188    | 8-9                           |
| 5      | CSF3R    | NM_156039    | 14, 17                        |
| 6      | DNMT3A   | NM_175629    | all coding exons              |
| 7      | ETNK1    | NM_018638    | 3 (partially)                 |
| 8      | EZH2     | NM_004456    | all coding exons              |
| 9      | FLT3_835 | NM_004119    | 20 (partially)                |
| 10     | IDH1     | NM_005896    | 4 (partially)                 |
| 11     | IDH2     | NM_002168    | 4 (partially)                 |
| 12     | JAK2     | NM_004972    | 14 (partially), 12            |
| 13     | KIT      | NM_000222    | 8 (partially), 17 (partially) |
| 14     | KRAS     | NM_004985    | 2-3 (partially)               |
| 15     | MPL      | NM_005373    | 10 (partially)                |
| 16     | MYD88    | NM_002468.4  | ENST00000417037               |
| 17     | NOTCH1   | NM_017617.4  | ENST00000277541               |
| 18     | NPM1     | NM_002520    | 11 (partially)                |
| 19     | NRAS     | NM_002524    | 2-3 (partially)               |
| 20     | RUNX1    | NM_001754    | all coding exons              |
| 21     | SETBP1   | NM_015559    | 4 (partially)                 |
| 22     | SF3B1    | NM_012433    | 13-16                         |
| 23     | SRSF2    | NM_003016    | 1 (partially)                 |
| 24     | TET2     | NM_001127208 | all coding exons              |
| 25     | TP53     | NM_000546    | all coding exons              |
| 26     | U2AF1    | NM_006758    | 2, 6 (partially)              |

69

70 Gating strategy of IA-HSCs

71 Gating of leukemic stem cells (LSCs) in AML samples using the LSC tube has been extensively described  
72 by Hanekamp et al. <sup>2</sup> Similarly, the CD34<sup>+</sup>CD38<sup>-</sup> stem cells and CD34<sup>+</sup>CD38<sup>dim</sup> immature progenitor cells  
73 were selected as summarized in [Figure S2](#). Lymphocytes were defined as FSC<sup>low</sup>/SSC<sup>low</sup>/CD45<sup>++</sup> (not  
74 shown) and used as an internal negative control (for CD33, CD44, CD123 and CD371) or positive  
75 control (for CD45RA and Combi) to determine the cut-off between normal stem cells and IA-HSCs. The  
76 CD34<sup>+</sup>CD38<sup>dim</sup> cell compartment was additionally studied to substantiate our definition of IA-HSCs,  
77 considering that abnormal marker expressions on CD34<sup>+</sup>CD38<sup>-</sup> cells may be passed onto downstream  
78 progenitors. All markers (i.e. CD33, CD44, CD123, CD45RA and Combi) were gated separately on  
79 CD34<sup>+</sup>CD38<sup>-</sup> cells. Generally, IA-HSCs were covered by more than one marker as shown in [Figure 1](#).  
80 Therefore, the best marker was selected to define the IA-HSCs load, presented as the percentage out  
81 of distinct reference categories, including CD34<sup>+</sup>CD38<sup>-</sup> cells, total CD34<sup>+</sup> cells and MNCs. Since we have  
82 shown before that aberrant antigen expression on both CD34<sup>+</sup>CD38<sup>+</sup> cells <sup>3</sup> and CD34<sup>+</sup> CD38<sup>-</sup> cells <sup>4</sup> are  
83 not affected by the freeze-thawing procedure, we used fresh as well as cryopreserved-thawed  
84 samples in our study.

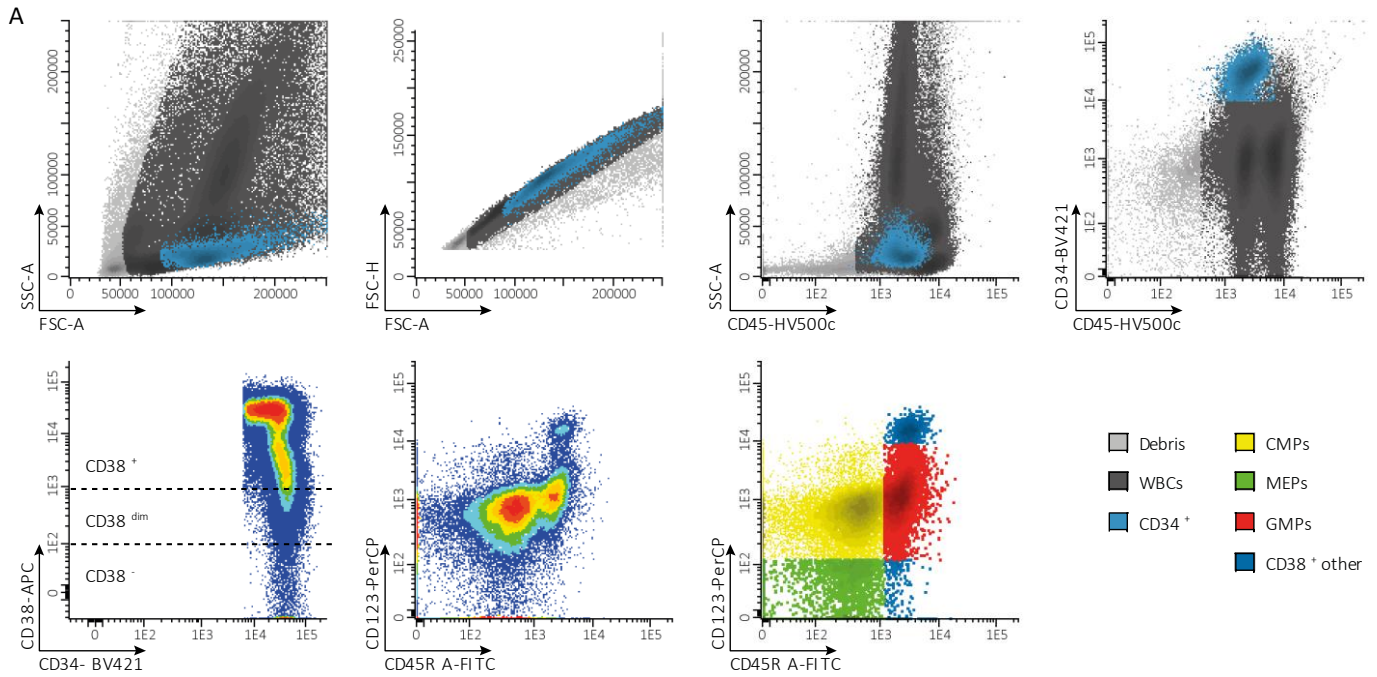

85 **Figure S2** Gating strategy

86 The FACS plots illustrate the gating strategy of the total CD34<sup>+</sup> compartment and distinct stem and  
 87 progenitor cell subsets for NBM05. Flow cytometry data were manually analyzed using Infinicyt software  
 88 (Cytognos). The remaining mature erythrocytes, debris and doublets were excluded in FSC-A/SSC-A and  
 89 FSC-A/FSC-H plots. Within the white blood cells (WBCs), the CD34<sup>+</sup> compartment was identified based  
 90 on intermediate CD45 and bright CD34 expression (in blue) and subsequently back-gated to  
 91 homogeneity in FSC-A/SSC-A and CD45/SSC-A plots (as shown in blue in the first two plots). The CD34<sup>+</sup>  
 92 compartment was divided into CD34<sup>+</sup>CD38<sup>-</sup> cells, CD34<sup>+</sup>CD38<sup>dim</sup> cells and CD34<sup>+</sup>CD38<sup>+</sup> progenitors using  
 93 density plots and CD38 calibration particles (Spherotech, not shown). The CD34<sup>+</sup>CD38<sup>+</sup> progenitors were  
 94 classified into CD45RA<sup>-</sup>CD123<sup>+</sup> common myeloid progenitors (CMPs), CD45RA<sup>+</sup>CD123<sup>+</sup> granulocyte-  
 95 monocyte progenitors (GMPs) and CD45RA<sup>-</sup>CD123<sup>-</sup> megakaryocyte-erythroid progenitors (MEPs). The  
 96 remaining CD34<sup>+</sup>CD38<sup>+</sup> progenitors that were not classified as CMPs, GMPs and MEPs comprise,  
 97 amongst others, common lymphoid cells and more mature subsets. Note that colors in the 5th and 6th  
 98 panel indicate cell density, whereas the colors in the 7th panel indicate cell populations.



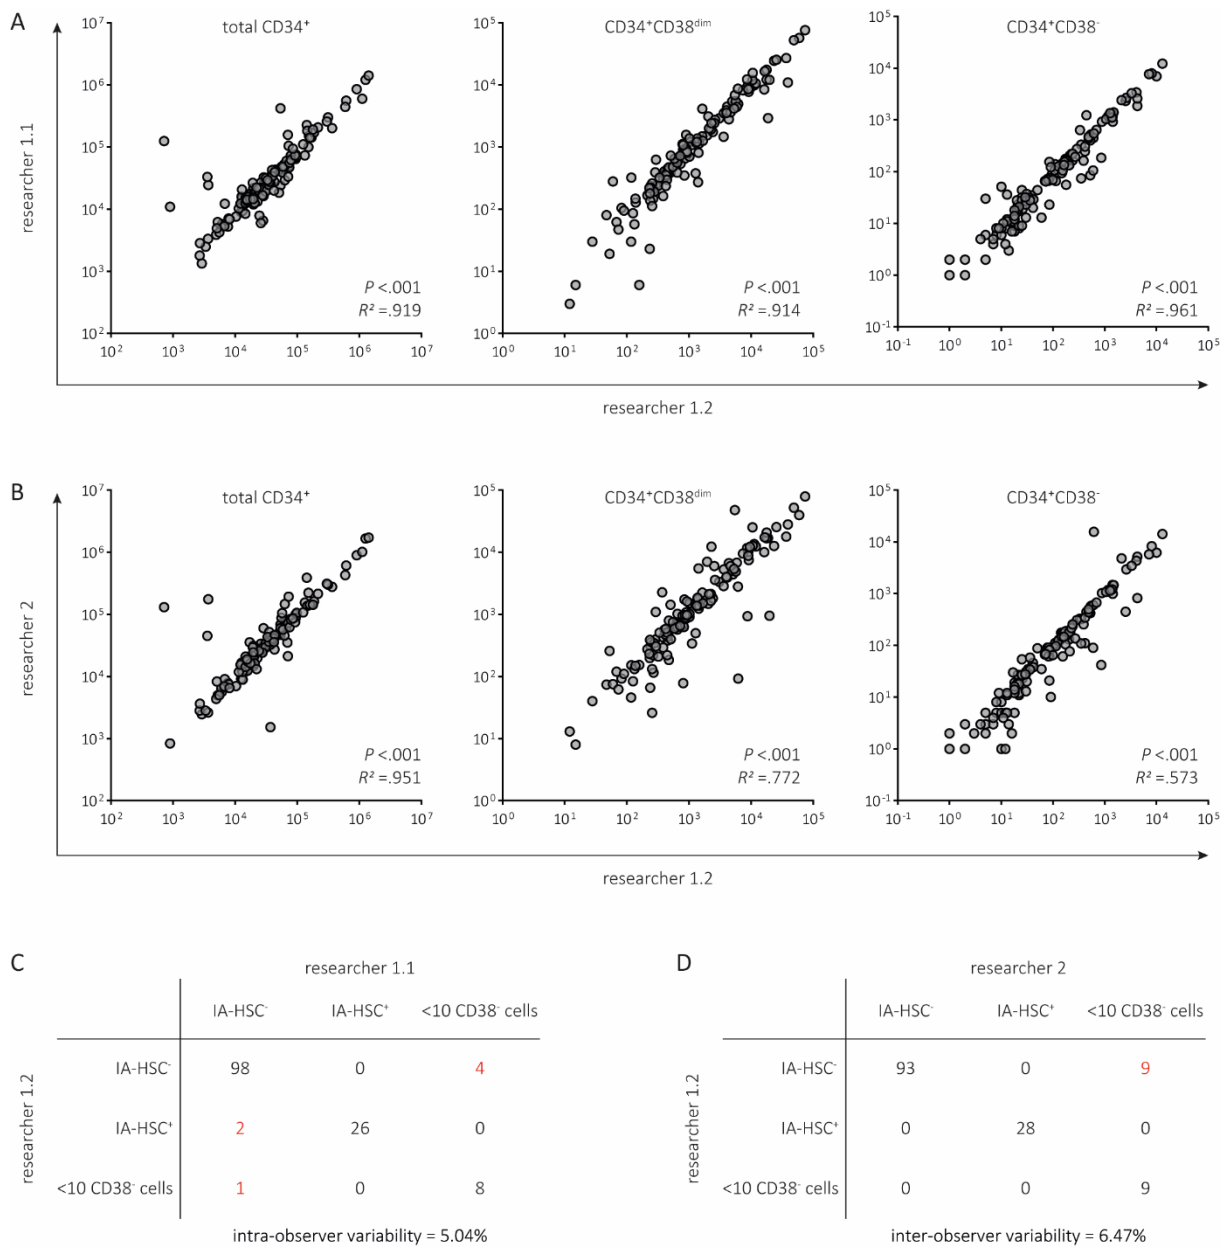

99 **Figure S3** Validation of the gating strategy

100 The data were analyzed twice by researcher 1 (referred as 1.1 and 1.2) and once by an additional  
 101 researcher 2 to assess intra- and inter-observer variability. Panel (A) shows strong correlations between  
 102 the absolute CD34<sup>+</sup> numbers. (B) There is a significant relationship between the analyses of researcher  
 103 1 and 2, although less strong for CD34<sup>+</sup>CD38<sup>dim</sup> and CD34<sup>+</sup>CD38<sup>-</sup> numbers due to their low abundance  
 104 and the subjectivity of discriminating CD38<sup>dim</sup> from CD38<sup>-</sup> and CD38<sup>+</sup>.

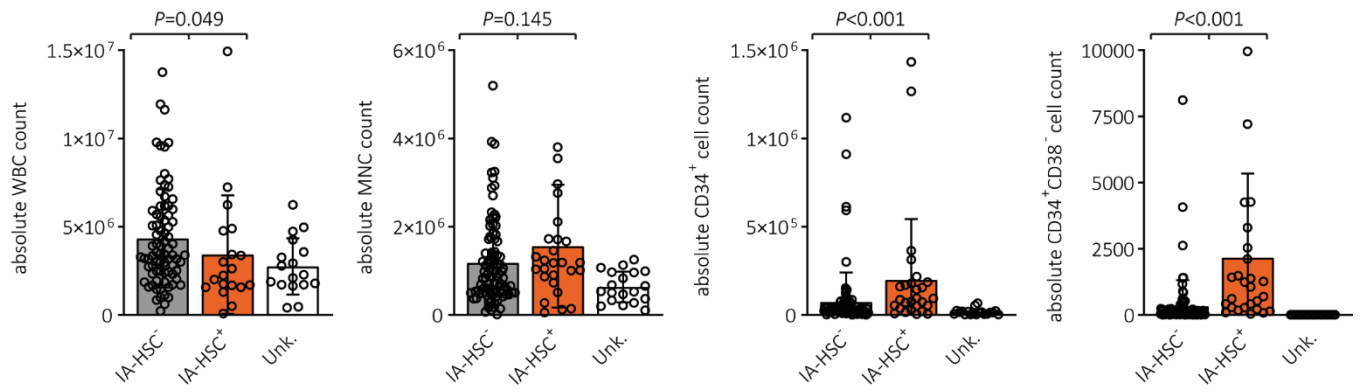

105 Figure S4 Measured CD34<sup>+</sup> cell counts

106 Boxplots illustrating the absolute number of WBCs and CD34<sup>+</sup> cell subsets in IA-HSC<sup>-</sup> and IA-HSC<sup>+</sup> BM  
 107 samples from all patients and controls. The number of CD34<sup>+</sup> and CD34<sup>+</sup>CD38<sup>-</sup> cell numbers was higher  
 108 in IA-HSC<sup>+</sup> as compared to IA-HSC<sup>-</sup> BM samples, whereas the number of measured WBCs (only shown  
 109 for freshly processed samples) was lower. To account for an underestimation of IA-HSCs numbers in  
 110 small samples, a limit of detection (LoD) and limit of quantification (LoQ) was set at 10 and 30  
 111 CD34<sup>+</sup>CD38<sup>-</sup> cells, respectively. The intra- and inter-observer variability of CD34<sup>+</sup> cell subset numbers  
 112 are summarized in [Figure S3](#).

113 Table S3A Univariate survival analysis

|                                           | LFS time                              | EFS time                                          | OS time                                           |
|-------------------------------------------|---------------------------------------|---------------------------------------------------|---------------------------------------------------|
| IA-HSCs (yes vs. no)                      | <b>P=0.004</b><br>HR=25 (2.9-218)     | <b>P&lt;0.001</b><br>HR=49 (6.1-387)              | <b>P&lt;0.001</b><br>HR=9.3 (3.2-27)              |
| IA-HSC (%) <sup>1</sup>                   | <b>P=0.065</b><br>HR=1.02 (1.00-1.04) | <b>P=0.002</b><br>HR=1.03 (1.01-1.05)             | <b>P&lt;0.001</b><br>HR=1.03 (1.02-1.05)          |
| CD34 <sup>+</sup> CD38 <sup>-</sup> (%)   | <b>P=0.055</b><br>HR=2.2 (0.98-5.13)  | P=0.153                                           | P=0.957                                           |
| CD34 <sup>+</sup> CD38 <sup>dim</sup> (%) | <b>P=0.029</b><br>HR=1.4 (1.03-1.81)  | <b>P=0.075</b><br>HR=1.3 (0.98-1.6)               | P=0.883                                           |
| CMPs (%)                                  | P=0.859                               | P=0.522                                           | P=0.992                                           |
| GMPs (%)                                  | P=0.455                               | <b>P=0.006</b><br>HR=1.09 (1.02-1.15)             | P=0.842                                           |
| MEPs (% <sup>1</sup> )                    | P=0.620                               | P=0.685                                           | P=0.125                                           |
| BM blasts (%)                             | P=0.291                               | P=0.695                                           | P=0.184                                           |
| >2 - <5 vs. ≤2                            |                                       |                                                   |                                                   |
| ≥5 - ≤10 vs. ≤2                           |                                       |                                                   |                                                   |
| >10 vs. ≤2                                |                                       |                                                   |                                                   |
| Hemoglobin (g/dL)                         | P=0.305                               | P=0.726                                           | P=0.341                                           |
| 8 - <10 vs. ≥10                           |                                       |                                                   |                                                   |
| <8 vs. ≥10                                |                                       |                                                   |                                                   |
| Platelets (·10 <sup>9</sup> /L)           | <b>P=0.095</b>                        | <b>P=0.043</b>                                    | <b>P=0.064</b>                                    |
| 50 - <100 vs. ≥100                        | HR=11 (1.2-99)                        | HR=6.6 (1.3-35)                                   | HR=2.4 (0.72-8.0)                                 |
| <50 vs. ≥100                              | HR=4.1 (0.25-65)                      | HR=7.7 (1.4-42)                                   | HR=3.9 (1.2-13)                                   |
| CCSS                                      | P=0.109                               | <b>P=0.010</b>                                    | <b>P=0.001</b>                                    |
| L vs. VL                                  |                                       | HR=9.7·10 <sup>2</sup> (0-7.2·10 <sup>102</sup> ) | HR=7.5·10 <sup>2</sup> (0-4.8·10 <sup>104</sup> ) |
| INT vs. VL                                |                                       | HR=5.6·10 <sup>2</sup> (0-4.1·10 <sup>102</sup> ) | HR=7.9·10 <sup>2</sup> (0-5.0·10 <sup>104</sup> ) |
| H vs. VL                                  |                                       | HR=1.2 (0-4.4·10 <sup>123</sup> )                 | HR=0.99 (0-4.9·10 <sup>124</sup> )                |
| VH vs. VL                                 |                                       | HR=1.5·10 <sup>4</sup> (0-1.1·10 <sup>104</sup> ) | HR=1.3·10 <sup>4</sup> (0-8.6·10 <sup>105</sup> ) |
| IPSS-R                                    | P=0.198                               | <b>P=0.038</b>                                    | <b>P=0.012</b>                                    |
| L vs. VL                                  |                                       | HR=1.2·10 <sup>4</sup> (0-8.3·10 <sup>105</sup> ) | HR=1.1·10 <sup>4</sup> (0-9.1·10 <sup>99</sup> )  |
| INT vs. VL                                |                                       | HR=7.6·10 <sup>4</sup> (0-5.3·10 <sup>106</sup> ) | HR=6.2·10 <sup>4</sup> (0-4.9·10 <sup>100</sup> ) |
| H vs. VL                                  |                                       | HR=3.8·10 <sup>4</sup> (0-2.6·10 <sup>106</sup> ) | HR=3.0·10 <sup>4</sup> (0-2.4·10 <sup>100</sup> ) |
| VH vs. VL                                 |                                       | HR=21·10 <sup>4</sup> (0-1.5·10 <sup>107</sup> )  | HR=2.1·10 <sup>5</sup> (0-1.6·10 <sup>101</sup> ) |
| Therapy                                   | <b>P=0.041</b>                        | <b>P=0.001</b>                                    | P=0.404                                           |
| LEN vs. SC                                | HR=0                                  | HR=0.8 (0.1-8.4)                                  |                                                   |
| AZN vs. SC                                | HR=3.9 (0.4-43)                       | HR=8.7 (1.6-46)                                   |                                                   |
| CTx/SCT vs. SC                            | HR=14 (2.3-89)                        | HR=20 (4.2-95)                                    |                                                   |

114 P values <0.100 are indicated by bold font and presented with the hazard ratio (95% CI). For categorical  
115 parameters, the first category was used as reference. The IA-HSC percentages are relative from total  
116 CD34<sup>+</sup>CD38<sup>-</sup> cells, whereas CD34<sup>+</sup>CD38<sup>-</sup> and CD34<sup>+</sup>CD38<sup>dim</sup> cell percentages are relative from MNCs. <sup>1</sup>  
117 The prognostic value of IA-HSC percentages was estimated in samples meeting the LoQ threshold, i.e.  
118 ≥30 CD34<sup>+</sup>CD38<sup>-</sup> cells (Figure S1). Abbreviations: VL, very low-risk; L, low-risk; INT, intermediate-risk; H,  
119 high-risk; VH, very high-risk; LEN, lenalidomide; AZA, azacitidine; CTx, chemotherapy; SC, supportive  
120 care; SCT, stem cell transplantation.

121 Table S3B Multivariate survival analysis

| Model | Parameters                                     | LFS time, <i>P</i> -value | EFS time, <i>P</i> -value | OS time, <i>P</i> -value |
|-------|------------------------------------------------|---------------------------|---------------------------|--------------------------|
| 1A    | IA-HSCs (yes vs. no)                           | <b>0.005</b>              | <b>&lt;0.001</b>          | <b>&lt;0.001</b>         |
|       | CD34 <sup>+</sup> CD38 <sup>-</sup> (%)        | 0.972                     | 0.489                     | 0.462                    |
| 1B    | IA-HSCs (yes vs. no)                           | <b>0.006</b>              | <b>&lt;0.001</b>          | <b>&lt;0.001</b>         |
|       | CD34 <sup>+</sup> CD38 <sup>dim</sup> (%)      | 0.954                     | 0.397                     | 0.322                    |
| 1C    | IA-HSCs (yes vs. no)                           | <b>0.002</b>              | <b>&lt;0.001</b>          | <b>&lt;0.001</b>         |
|       | GMPs (%)                                       | 0.316                     | 0.147                     | 0.865                    |
| 1D    | IA-HSCs (yes vs. no)                           | <b>0.007</b>              | <b>0.001</b>              | <b>0.001</b>             |
|       | Platelets ( $\cdot 10^9/L$ )                   | 0.206                     | 0.530                     | 0.696                    |
|       | 50 - <100 vs. $\geq 100$<br><50 vs. $\geq 100$ |                           |                           |                          |
| 1E    | IA-HSCs (yes vs. no)                           | <b>0.010</b>              | <b>0.001</b>              | <b>0.030</b>             |
|       | CCSS                                           | 0.748                     | 0.732                     | 0.200                    |
|       | L vs. VL                                       |                           |                           |                          |
|       | INT vs. VL                                     |                           |                           |                          |
|       | H vs. VL<br>VH vs. VL                          |                           |                           |                          |
| 1F    | IA-HSCs (yes vs. no)                           | <b>0.007</b>              | <b>0.001</b>              | <b>0.007</b>             |
|       | IPSS-R                                         | 0.468                     | 0.770                     | 0.424                    |
|       | L vs. VL                                       |                           |                           |                          |
|       | INT vs. VL                                     |                           |                           |                          |
|       | H vs. VL<br>VH vs. VL                          |                           |                           |                          |
| 1G    | IA-HSCs (yes vs. no)                           | <b>0.034</b>              | <b>0.003</b>              | <b>&lt;0.001</b>         |
|       | Therapy                                        | 0.243                     | <b>0.049</b>              | 0.856                    |
|       | LEN vs. SC                                     |                           |                           |                          |
|       | AZN vs. SC                                     |                           |                           |                          |
|       | CTx/SCT vs. SC                                 |                           |                           |                          |

122 *P* values <0.100 are indicated by bold font. For categorical parameters, the first category was used as  
123 reference. The IA-HSC percentages are relative from total CD34<sup>+</sup>CD38<sup>-</sup> cells, whereas CD34<sup>+</sup>CD38<sup>-</sup> and  
124 CD34<sup>+</sup>CD38<sup>dim</sup> cell percentages are relative from MNCs. Although the variable therapy added significant  
125 prognostic value to the presence of IA-HSCs, no further models are shown because of the low number  
126 of events. Abbreviations: VL, very low-risk; L, low-risk; INT, intermediate-risk; H, high-risk; VH, very high-  
127 risk; LEN, lenalidomide; AZA, azacitidine; CTx, chemotherapy; SC, supportive care; SCT, stem cell  
128 transplantation.

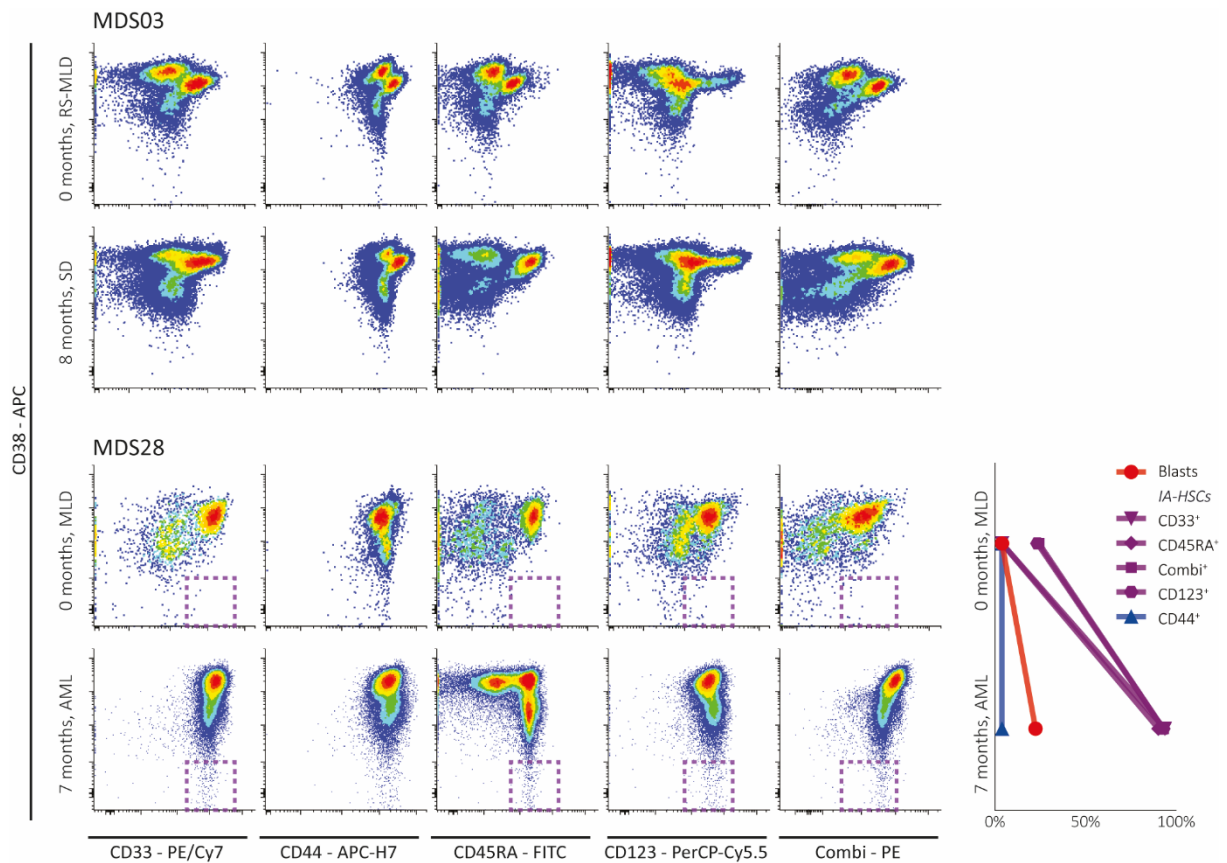

129 Figure S5 Analysis of stem cells in sequential bone marrow samples  
 130 Sequential BM samples were available in some MDS patients. This figure demonstrates an example of a  
 131 MDS patient with a stable disease and disease progression. The expression of CD33, CD44, CD45RA,  
 132 CD123 and Combi markers on the total CD34<sup>+</sup> HSPC compartment is presented. In MDS03, the second  
 133 BM sample collected 8 months after diagnosis confirmed a stable disease (SD) with preservation of HSCs  
 134 with immunophenotypes similar to the profile at the time of diagnosis. In MDS28, leukemic progression  
 135 co-occurs with an expansion of IA-HSCs.

136 **Table S4** Mutations in BM-MNCs from a subsampled MDS patient cohort

| ID    | IA-HSC% <sup>1</sup> | IPSS-R | Outcome   | Gene   | VAF | Function                            |
|-------|----------------------|--------|-----------|--------|-----|-------------------------------------|
| MDS13 | 0.000 <sup>2</sup>   | L      | OS 33 mo  | SRSF2  | 48% | RNA splicing                        |
| MDS20 | 0.000                | L      | OS >46 mo | CALR   | 27% | chaperoning and calcium homeostasis |
| MDS43 | 0.000 <sup>3</sup>   | H      | OS >17 mo | NRAS   | 48% | signal transduction                 |
|       |                      |        |           | ASXL1  | 46% | chromatin remodeling                |
|       |                      |        |           | ETNK1  | 46% | phosphatidylethanolamine synthesis  |
|       |                      |        |           | RUNX1  | 33% | transcription                       |
| MDS28 | 0.001                | L      | LFS 7 mo  | -      |     |                                     |
| MDS73 | 0.045                | L      | EFS 3 mo  | DNMT3A | 51% | DNA methylation                     |
|       |                      |        |           | IDH2   | 47% | DNA methylation                     |
|       |                      |        |           | SRSF2  | 46% | RNA splicing                        |
| MDS44 | 0.007                | INT    | OS >1mo   | SETPB1 | 44% | histone methylation                 |
|       |                      |        |           | SRSF2  | 47% | pre-mRNA splicing                   |
| MDS9  | 0.012                | INT    | EFS 18 mo | SRSF2  | 51% | RNA splicing                        |
|       |                      |        |           | IDH2   | 43% | DNA methylation                     |
|       |                      |        |           | ASXL1  | 42% | RNA splicing                        |
| MDS10 | 0.036                | INT    | EFS 6 mo  | TP53   | 81% | tumor suppressor                    |
| MDS17 | 0.306                | INT    | OS 9 mo   | SFRB1  | 49% | RNA splicing                        |
|       |                      |        |           | SRSF2  | 46% | RNA splicing                        |
|       |                      |        |           | ASXL1  | 35% | chromatin remodeling                |
|       |                      |        |           | RUNX1  | 15% | transcription                       |
|       |                      |        |           | TET2   | 1%  | DNA methylation                     |
| MDS8  | 0.026                | VH     | EFS 3 mo  | TP53   | 35% | tumor suppressor                    |

137 Patients are ranked by the percentage of IA-HSCs and IPSS-R. Using the TruSight panel (Table S2),  
138 genomic variants were detected in BM-MNCs from all MDS patients except for MDS28. <sup>1</sup> The percentage  
139 of IA-HSCs relative to MNCs. <sup>2</sup> In MDS13, the limit of detection of IA-HSCs was not reached as only 5  
140 CD34<sup>+</sup>CD38<sup>-</sup> cells were measured. <sup>3</sup> Although the number of mutations found in MDS43-derived MNCs  
141 may question the sensitivity of flow cytometric detection of IA-HSCs, it is important to note that 94  
142 CD34<sup>+</sup>CD38<sup>-</sup> cells, a relatively high number, were measured in this patient sample.

143 In vivo xenotransplantation

144 Cryopreserved BM-MNCs from 10 MDS patients (IA-HSC<sup>-</sup>, n = 3; IA-HSC<sup>+</sup>, n = 7) at the time of diagnosis  
145 were thawed as described above. Due to the scarcity of bone marrow tissue, the absence of IA-HSCs in  
146 one MDS sample (UPN: MDS75) was defined using a diagnostic MDS panel including CD7, CD11b, CD33,  
147 CD56 and CD123 but not CD44 and CD45RA. Thawed BM-MNCs were washed and suspended in PBS  
148 with 0.1% HSA. To deplete T cells, BM-MNCs were incubated with CD3 microbeads (Miltenyi) and loaded  
149 onto MACS columns following manufacturers' instructions. The CD3 depletion failed in four experiments  
150 (Figure S6). We decided to inject all xenografts irrespective of the CD3<sup>+</sup> percentage and to account for  
151 xenograft variances afterwards as described below. Female NSG (NOD/SCID gamma) mice were  
152 purchased from the Jackson Laboratory (Harbor, MN). One day before transplantation, the 9-weeks old  
153 mice were sublethally irradiated (200 cGy). The xenografts were injected via the tail vein in five mice  
154 per MDS patient. The division of xenografts in mice was not randomized nor blinded. Eight mice were  
155 sacrificed ahead of the experimental endpoint because of abnormal behavior directly after irradiation  
156 (n=1), severe weight loss (n=5) and intra-abdominal masses (n=2). The remaining 42 mice were  
157 sacrificed at 20 weeks post-transplantation. Peripheral blood (PB), the spleen and BM were harvested.  
158 All compartments were stained for the presence of murine CD45 (muCD45) and human CD45 (huCD45)  
159 in addition to lineage- and leukemia-associated markers (Table S1B). Mice with a minimum of 0.5% cells  
160 expressing huCD45 and another human cell marker apart from CD3 (CD19, CD33, CD34) relative to the  
161 total CD45 compartment (sum muCD45 and huCD45) were considered as engrafted. Mice showing  
162 human engraftment were studied for the presence of leukemic cells. Leukemic engraftment was  
163 suggested by an increased blast count in addition to the presence of leukemia-associated  
164 immunophenotypes corresponding to the original patient sample. Engraftment percentages were  
165 related to both MDS patient characteristics and xenograft variances, including the number of injected  
166 CD3<sup>+</sup> T cells and total BM-MNCs (Figure S6).

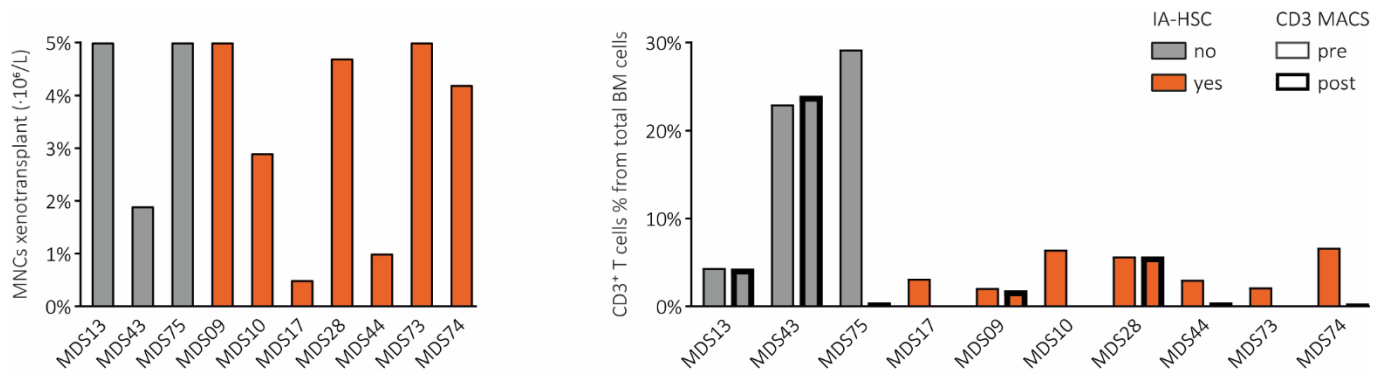

167 Figure S6 Xenograft counts

168 The number of frozen-thawed BM-MNCs per MDS xenograft and percentage of CD3<sup>+</sup> T cells before (pre)

169 and after CD3 depletion (post) using MACS.



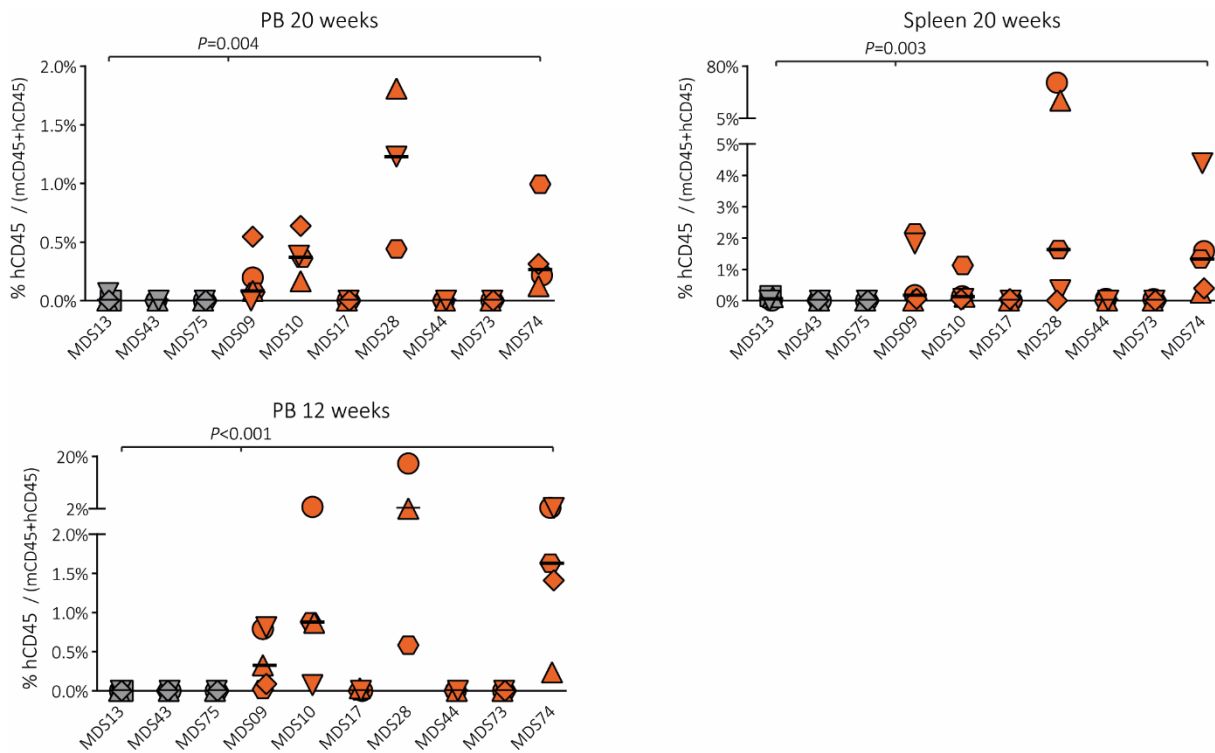

170 Figure S7 Human engraftment in spleen and peripheral blood

171 Mice injected with IA-HSC<sup>-</sup> or IA-HSC<sup>+</sup> MDS samples are indicated by the grey and orange color,  
 172 respectively. The percentages of huCD45<sup>+</sup> cells are plotted as median with 95%CI. At 12 weeks, PB was  
 173 drawn via the tail vein to assess human engraftment. At 20 weeks, mice were sacrificed and the PB, BM  
 174 and spleen were studied. The difference in huCD45<sup>+</sup> cells between IA-HSC<sup>+</sup> and IA-HSC<sup>-</sup> transplanted  
 175 mice was tested for statistical significance using the Mann-Whitney U test, as indicated by the *P*-values.

176 **References**

- 177 1. Zeijlemaker W, Kelder A, Oussoren-Brockhoff YJ, Scholten WJ, Snel AN, Veldhuizen D, et al. A simple  
178 one-tube assay for immunophenotypical quantification of leukemic stem cells in acute myeloid  
179 leukemia. *Leukemia* 2016; 30: 439-46.
- 180 2. Hanekamp D, Snel AN, Kelder A, Scholten WJ, Khan N, Metzner M, et al. Applicability and  
181 reproducibility of acute myeloid leukaemia stem cell assessment in a multi-centre setting. *Br J Haematol*  
182 2020; 190: 891-900.
- 183 3. van der Pol MA, Pater JM, Feller N, Westra AH, van Stijn A, Ossenkoppele GJ, et al. Functional  
184 characterization of minimal residual disease for P-glycoprotein and multidrug resistance protein activity  
185 in acute myeloid leukemia. *Leukemia* 2001; 15: 1554-63.
- 186 4. van Rhenen A, Feller N, Kelder A, Westra AH, Rombouts E, Zweegman S, et al. High stem cell frequency  
187 in acute myeloid leukemia at diagnosis predicts high minimal residual disease and poor survival. *Clin*  
188 *Cancer Res* 2005; 11: 6520-7.
